# Supplementary material for: Plasma membrane proteoglycans syndecan-2 and syndecan-4 engage with EGFR and RON kinase to sustain carcinoma cell cycle progression
Source: PubMed Central journal article supplement (PMC9190016; doi:10.1016/j.jbc.2022.102029), 2022-05-13
Supplement: mmc1.pdf [file mmc1.pdf]

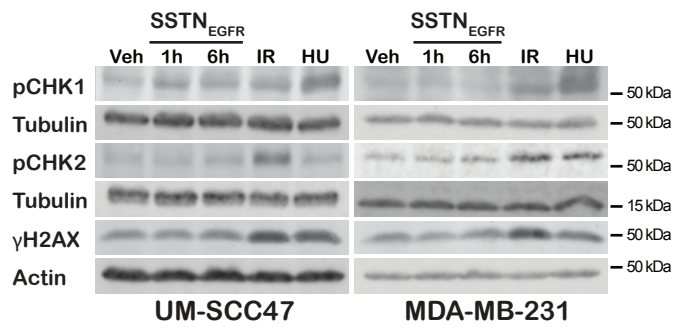

Supporting Information  
 FIGURE 1S. BEAUVAIS ET AL.
